# Supplementary material for: Association between Serum 25-Hydroxy Vitamin D Levels and the Prevalence of Adult-Onset Asthma
Source: MDPI journal article supplement (doi:10.3390/ijerph15061103), 2018-05-29

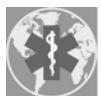

# Supplementary Materials: Association Between Serum 25-Hydroxy Vitamin D Levels and the Prevalence of Adult-Onset Asthma

Mark P. C. Cherrie <sup>1,2</sup>, Christophe Sarran <sup>3</sup> and Nicholas J. Osborne <sup>2,4,\*</sup>

<sup>1</sup> Centre for Research on Environment, Society and Health, Institute of Geography, Drummond Street, Edinburgh EH8 9XP, UK; [mark.cherrie@ed.ac.uk](mailto:mark.cherrie@ed.ac.uk)

<sup>2</sup> European Centre for Environment and Human Health, University of Exeter Medical School, Truro, TR1 3HD, UK

<sup>3</sup> Met Office, FitzRoy Road, Exeter, Devon EX1 3PB, UK; [christophe.sarran@metoffice.gov.uk](mailto:christophe.sarran@metoffice.gov.uk)

<sup>4</sup> School of Public Health and Community Medicine, University of New South Wales, Sydney Australia 2052, Australia

\* Correspondence: [n.osbone@unsw.edu.au](mailto:n.osbone@unsw.edu.au); Tel.: +61-293851929 or +61-431854846

**Table S1.** Sensitivity Analysis- The association between 25(OH)D levels and asthma prevalence at age 50, by specific IgE category.

|                                | Vitamin D status             |                              |                         | 25(OH)D level          |
|--------------------------------|------------------------------|------------------------------|-------------------------|------------------------|
|                                | Insufficient<br>(<50 nmol/L) | Sufficient<br>(50–75 nmol/L) | Optimal<br>(>75 nmol/L) | Per 10 nmol/L increase |
| Low Specific IgE (<0.35 kU/L)  |                              |                              |                         |                        |
| Model 1 <sup>¶</sup>           | Ref                          | 0.81 (0.65–1.01)             | 0.59 (0.41–0.85)**      | 0.88 (0.83–0.93)**     |
| Model 2 <sup>#</sup>           | Ref                          | 0.83 (0.66–1.04)             | 0.60 (0.42–0.89)**      | 0.88 (0.83–0.94)**     |
| Model 3 <sup>¥</sup>           | Ref                          | 0.92 (0.73–1.16)             | 0.68 (0.46–1.01)        | 0.91 (0.86–0.98)*      |
| High Specific IgE (>0.35 kU/L) |                              |                              |                         |                        |
| Model 1 <sup>¶</sup>           | Ref                          | 0.96 (0.63–1.45)             | 1.24 (0.73–1.03)        | 1.01 (0.91–1.12)       |
| Model 2 <sup>#</sup>           | Ref                          | 0.97 (0.63–1.51)             | 1.28 (0.67–2.44)        | 1.03 (0.93–1.15)       |
| Model 3 <sup>¥</sup>           | Ref                          | 0.94 (0.60–1.47)             | 1.28 (0.66–2.48)        | 1.03 (0.92–1.16)       |
| Adjusted for sex and season    |                              |                              |                         |                        |

<sup>#</sup> additionally adjusted for smoking status at age 42, TV and PC time, physical activity at age 42, outdoor activity at age 46, oily fish consumption, vitamin D supplementation at age 46, region of residence at age 46, occupational social class at birth (father's occupation) and at age 46; <sup>¥</sup> additionally adjusted BMI, BMI squared, waist circumference, waist circumference squared. \* p <0.05, \*\* p <0.01.

**Table S2.** Sensitivity Analysis-The association between 25(OH)D levels and asthma prevalence at age 50, by total IgE category.

|                             | Vitamin D status             |                              |                         | 25(OH)D level          |
|-----------------------------|------------------------------|------------------------------|-------------------------|------------------------|
|                             | Insufficient<br>(<50 nmol/L) | Sufficient<br>(50–75 nmol/L) | Optimal<br>(>75 nmol/L) | Per 10 nmol/L increase |
| Low total IgE (<160kU/L)    |                              |                              |                         |                        |
| Model 1 <sup>¶</sup>        | Ref                          | 0.79 (0.60–1.03)             | 0.55 (0.35–0.87)*       | 0.86 (0.80–0.93)**     |
| Model 2 <sup>#</sup>        | Ref                          | 0.83 (0.63–1.10)             | 0.58 (0.36–0.93)*       | 0.88 (0.82–0.95)**     |
| Model 3 <sup>¥</sup>        | Ref                          | 0.92 (0.69–1.23)             | 0.64 (0.39–1.05)        | 0.91 (0.84–0.99)*      |
| High total IgE (>160kU/L)   |                              |                              |                         |                        |
| Model 1 <sup>¶</sup>        | Ref                          | 0.88 (0.67–1.17)             | 0.91 (0.59–1.40)        | 0.95 (0.89–1.03)       |
| Model 2 <sup>#</sup>        | Ref                          | 0.92 (0.68–1.24)             | 0.96 (0.61–1.51)        | 0.97 (0.89–1.04)       |
| Model 3 <sup>¥</sup>        | Ref                          | 0.96 (0.71–1.29)             | 1.03 (0.65–1.64)        | 0.98 (0.91–1.06)       |
| Adjusted for sex and season |                              |                              |                         |                        |

<sup>#</sup> additionally adjusted for smoking status at age 42, TV and PC time, physical activity at age 42, outdoor activity at age 46, oily fish consumption, vitamin D supplementation at age 46, region of residence at age 46, occupational social class at birth (father's occupation) and at age 46; <sup>¥</sup> additionally adjusted BMI, BMI squared, waist circumference, waist circumference squared. \* p <0.05, \*\* p <0.01.

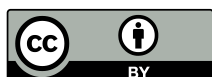

Supplement: s1 [file s1]
